# Supplementary material for: Potential therapeutic targets and molecular details of anthocyan-treated inflammatory bowel disease: a systematic bioinformatics analysis of network pharmacology
Source: Royal Society of Chemistry journal article supplement (doi:10.1039/d0ra09117k), 2021-01-01
Supplement: d0ra09117k1.pdf [file d0ra09117k1.pdf]

**Supplementary Table 1** Anti-inflammatory effects of anthocyanidins enriched plant and fruit (cell and animal study).

| Food                       | Model                                                        | Model                               | Route of administration/dosage                                     | Result                                                                                                                                                                                                                               | Ref. |
|----------------------------|--------------------------------------------------------------|-------------------------------------|--------------------------------------------------------------------|--------------------------------------------------------------------------------------------------------------------------------------------------------------------------------------------------------------------------------------|------|
| Blueberry                  | Assessment of cecal microbiota activity and colon morphology | mdr1a/mice                          | Oral: 10%                                                          | ↑Concentrations of butyric acid ↓concentrations of succinic acid<br>↑Colon crypt size and number of goblet cells per crypt<br>↓Number of Clostridium perfringens, Enterococcus spp. and Lactobacillus spp.                           | [1]  |
|                            | TNBS-induced UC                                              | Female-C57BL/6 mice                 | Oral: 10, 20 and 40 mg/ kg                                         | ↓Weight gain ↓Mortality ↓Diarrhea score<br>↓Shortening of the colons owing to inflammation and hydropsia<br>↓Mucosal congestion, erosion and thickening of the colon wall<br>↑Goblet cells and IL-10 ↓NO, MPO, IL-12, TNFα and IFN-γ | [2]  |
|                            | DSS-induced UC                                               | Rat                                 | Oral: 5 g/rat                                                      | ↓Disease activity index ↓MPO activity ↓MDA<br>↓Bacterial translocation ↓Aerobic and anaerobic bacterial count<br>↓MCP-1and GRO/CINC-1 (not significant) ↑Cecal SCFA                                                                  | [3]  |
| Barberry                   | Acetic acid-induced UC                                       | Male Wistar rats                    | Oral: 375, 750, and 1500 mg/kg<br>Rectal: 750 and 1500 mg/kg       | ↓Ulcer area and macroscopic ulcer index<br>↓Colon wet weight/length ratio<br>↓Inflammatory cells infiltration ↓Epithelial necrosis and lesions<br>↑Colon crypt size and number of goblet cells per crypt                             | [4]  |
| Sunrouge                   | DSS-induced UC                                               | Male-specific pathogenfree ICR mice | Oral: 0.16 mg/day                                                  | ↑Survival rates ↓Body weight loss ↑Length of colorectum<br>↓Spleen hypertrophy ↑Anthocyanin concentrations in tissues and serum<br>↑ALT, no difference in TNFα, IL-1b and IL-6                                                       | [5]  |
| Cranberry                  | DSS-induced UC                                               | Male BALB/c mice                    | Oral: 0.1 and 1% extract powder, 1.5% dried whole cranberry powder | ↓Colon length ↓MPO activity ↓TNFα and IL-1b serum level<br>↓TNFα and IL-1b gene expression ↓Disease activity index<br>↓Structural damage in colonic mucosa<br>↓Inflammatory cells infiltration                                       | [6]  |
| Bilberry                   | DSS-induced UC                                               | BALB/c mice                         | Oral: 20% dried bilberry 1 and 10% anthocyanin extract             | ↓Secretion of IFN-γ, TNFα and IL-6 ↓Intestinal inflammation<br>↓Histological scores ↓Colon shortening<br>↓leukocytes infiltration ↓Apoptotic epithelial cells                                                                        | [7]  |
|                            | Intestinal oxidative stress induced by ischemia reperfusion  | Male BALB/c mice                    | Oral: 1.62 g/mouse                                                 | ↓MDA ↓Mucosal injury in the ileum                                                                                                                                                                                                    | [8]  |
| Cooked navy and black bean | DSS-induced UC                                               | C57BL/6 mice                        | Oral: 20% navy bean or black bean                                  | ↑Cecal SCFA concentrations<br>↓mRNA expression of colonic inflammatory cytokines (IL-6, IL-9, IFN-γ and IL-17A) ↑Anti-inflammatory IL-8, IL-10, Tlr4 and FasL                                                                        | [9]  |

|                 |                |                    |                                |                                                                                                                                                                                                                                                                                                                                                                                                                        |      |
|-----------------|----------------|--------------------|--------------------------------|------------------------------------------------------------------------------------------------------------------------------------------------------------------------------------------------------------------------------------------------------------------------------------------------------------------------------------------------------------------------------------------------------------------------|------|
|                 |                |                    |                                | ↓Serum levels of IL-1b, TNFa, IFN-g and IL-17a<br>↑Cecal SCFA and fecal phenolic compound concentrations<br>↑Histological injury score and apoptosis<br>↑Serum ORAC, reversed splenic tissue weight increase                                                                                                                                                                                                           |      |
| Black raspberry | DSS-induced UC | C57BL/6J male mice | Oral: 5% black raspberry diets | ↓Staining of macrophages and neutrophils<br>↓NFkB p65 nuclear localization in the colon<br>↓Ulceration in the mucosa, submucosa and muscularis on day 28<br>↓Protein expression of DNMT3B, HDAC1, HDAC2 and MBD2<br>↓HDAC1 mRNA expression in spleen,<br>↓mRNA expression of DNMT3B, HDAC1, HDAC2 and MBD2 in bone marrow<br>↑Methylation and mRNA expression of dkk3, dkk2 and apc<br>↓B-catenin nuclear localization | [10] |

ALT: Alanine transaminase; DNMT: Deoxyribonucleic acid methyltransferase; DSS: Dextran sodium sulfate; FasL: Fas ligand; GRO/CINC-1: Growth-regulated oncogene/cytokine induced neutrophil chemoattractants-1; HDAC: Histone deacetylases; iNOS: Inducible nitric oxide synthase; MBD: Methyl-binding domain; MCP-1: Monocyte chemoattractant protein-1; MDA: Malondialdehyde; MPO: Myeloperoxidase; NO: Nitric oxide; ORAC: Oxygen radical absorbance capacity; p-Ikba: Phospho-Ikba; PMN: Polymorphonuclear; SCFA: Short-chain fatty acids; Tlr4: Toll-like receptor 4; TNBS: 2,4,6-Trinitrobenzene sulfonic acid; UC: Ulcerative colitis.

#### Notes and references:

1. Paturi, G., et al., *Influence of dietary blueberry and broccoli on cecal microbiota activity and colon morphology in mdr1a(-/-) mice, a model of inflammatory bowel diseases*. Nutrition, 2012. **28**(3): p. 324-30.
2. Xiao, X., et al., *Preventive effects of cranberry products on experimental colitis induced by dextran sulphate sodium in mice*. Food Chem, 2015. **167**: p. 438-46.
3. Osman, N., et al., *Probiotics and blueberry attenuate the severity of dextran sulfate sodium (DSS)-induced colitis*. Dig Dis Sci, 2008. **53**(9): p. 2464-73.
4. Minaiyan, M., et al., *Comparative Study of Berberis vulgaris Fruit Extract and Berberine Chloride Effects on Acetic Acid-Induced Colitis in Rats*. Iran J Pharm Res, 2011. **10**(1): p. 97-104.
5. Akiyama, S., et al., *Effects of anthocyanin-rich tea "Sunrouge" on dextran sodium sulfate-induced colitis in mice*. Biofactors, 2012. **38**(3): p. 226-33.
6. Rossi, A., et al., *Protective effects of anthocyanins from blackberry in a rat model of acute lung inflammation*. Free Radic Res, 2003. **37**(8): p. 891-900.
7. Biedermann, L., et al., *Bilberry ingestion improves disease activity in mild to moderate ulcerative colitis - an open pilot study*. J Crohns Colitis, 2013. **7**(4): p. 271-9.
8. Jakešević, M., et al., *Effects of bilberry (Vaccinium myrtillus) in combination with lactic acid bacteria on intestinal oxidative stress induced by ischemia-reperfusion in mouse*. J Agric Food Chem, 2013. **61**(14): p. 3468-78.
9. Zhang, C., et al., *Cooked navy and black bean diets improve biomarkers of colon health and reduce inflammation during colitis*. Br J Nutr, 2014. **111**(9): p. 1549-63.
10. Wang, L.S., et al., *Dietary black raspberries modulate DNA methylation in dextran sodium sulfate (DSS)-induced ulcerative colitis*. Carcinogenesis, 2013. **34**(12): p. 2842-50.

**Supplementary Table 2** Anti-inflammatory activity/ potential of the six most common anthocyanidins.

| Anthocyanidins | Structure                                                                           | Model                                        | Concentration/dose                                                                           | Signaling pathways and downstream genes                                                                                                                                                                                  | Pharmacological activity    | Ref. |
|----------------|-------------------------------------------------------------------------------------|----------------------------------------------|----------------------------------------------------------------------------------------------|--------------------------------------------------------------------------------------------------------------------------------------------------------------------------------------------------------------------------|-----------------------------|------|
| Pelargonidin   | 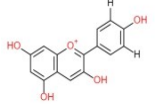   | Murine J774 macrophages                      | 100 $\mu\text{mol L}^{-1}$                                                                   | $\downarrow$ iNOS, $\downarrow$ NF $\kappa$ B                                                                                                                                                                            | Anti-inflammatory activity  | [1]  |
| Cyanidin       |    | In vitro enzyme inhibition assay             | IC <sub>50</sub> = 90 $\mu\text{mol L}^{-1}$<br>IC <sub>50</sub> = 60 $\mu\text{mol L}^{-1}$ | $\downarrow$ COX-1 $\downarrow$ COX-2                                                                                                                                                                                    | Anti-inflammatory potential | [2]  |
|                |                                                                                     | In vitro enzyme inhibition assay             | 40 $\mu\text{mol L}^{-1}$                                                                    | $\downarrow$ COX-1* $\downarrow$ COX-2*                                                                                                                                                                                  | Anti-inflammatory potential | [3]  |
|                |                                                                                     | In vitro enzyme inhibition assay             | 0.15-1.2 $\mu\text{mol L}^{-1}$                                                              | $\downarrow$ PLA2 A                                                                                                                                                                                                      | Anti-inflammatory potential | [4]  |
|                |                                                                                     | LPS-induced RAW 264.7 cells                  | 1-5 $\mu\text{mol L}^{-1}$                                                                   | $\downarrow$ COX-2 $\downarrow$ ERK1/2<br>$\downarrow$ IL-1 $\downarrow$ iNOS,<br>$\downarrow$ I $\kappa$ B- $\alpha$ $\downarrow$ JNK1/2<br>$\downarrow$ NF- $\kappa$ B $\downarrow$ p38<br>$\downarrow$ TNF- $\alpha$  | Anti-inflammatory activity  | [5]  |
| Delphinidin    |  | In vitro enzyme inhibition assay             | 0.15-1.2 mmol L <sup>-1</sup>                                                                | $\downarrow$ PLA2                                                                                                                                                                                                        | Anti-inflammatory potential | [6]  |
|                |                                                                                     | LPS-activated murine macrophage RAW264 cells | 25-100 $\mu\text{mol L}^{-1}$                                                                | $\downarrow$ AP-1 $\downarrow$ C/EBP $\delta$<br>$\downarrow$ c-Jun $\downarrow$ COX-2<br>$\downarrow$ ERK1/2 $\downarrow$ I $\kappa$ B- $\alpha$<br>$\downarrow$ JNK1/2 $\downarrow$ NF- $\kappa$ B<br>$\downarrow$ p38 | Anti-inflammatory activity  | [7]  |
| Peonidin       |  | In vitro enzyme inhibition assay             | 0.15-2.1 $\mu\text{mol L}^{-1}$                                                              | $\downarrow$ PLA2                                                                                                                                                                                                        | Anti-inflammatory potential | [6]  |
|                |                                                                                     | TPS-stimulated JB6 P+ mouse epidermal cells  | 5-20 $\mu\text{mol L}^{-1}$                                                                  | $\downarrow$ COX-2<br>$\downarrow$ ERK1/2 A                                                                                                                                                                              | Anti-inflammatory activity  | [8]  |
| Petunidin      |  | In vitro enzyme inhibition assay             | 0.15-2.1 $\mu\text{mol L}^{-1}$                                                              | $\downarrow$ PLA2                                                                                                                                                                                                        | Anti-inflammatory           | [6]  |

|          |                                                                                   |                                  |                                 |                                       |                             |     |
|----------|-----------------------------------------------------------------------------------|----------------------------------|---------------------------------|---------------------------------------|-----------------------------|-----|
|          |                                                                                   |                                  |                                 |                                       | potential                   |     |
| Malvidin | 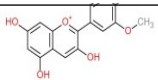 | In vitro enzyme inhibition assay | 0.15-2.1 $\mu\text{mol L}^{-1}$ | $\downarrow$ PLA2                     | Anti-inflammatory potential | [6] |
|          |                                                                                   | In vitro enzyme inhibition assay | 40 $\mu\text{mol L}^{-1}$       | $\downarrow$ COX-1 $\downarrow$ COX-2 | Anti-inflammatory potential | [3] |

$\downarrow$ inhibition. \*, the most potent inhibitor when compared to other anthocyanidins. AP: activator protein; COX: cyclooxygenase; C/EBP: CCAAT/enhancer-binding protein; ERK: extracellular signal-regulated kinase; iNOS: inducible nitric oxid synthase; I $\kappa$ B: inhibitor of nuclear factor kappa B kinase; IL: interleukin; JNK: c-Jun N-terminal kinase; NF- $\kappa$ B: nuclear factor kappa B; PLA: phospholipase A; p38: p38 kinase; TNF: tumor necrosis factor;

## Notes and references:

1. Hämäläinen, M., et al., *Anti-inflammatory effects of flavonoids: genistein, kaempferol, quercetin, and daidzein inhibit STAT-1 and NF-kappaB activations, whereas flavone, isorhamnetin, naringenin, and pelargonidin inhibit only NF-kappaB activation along with their inhibitory effect on iNOS expression and NO production in activated macrophages.* Mediators Inflamm, 2007. **2007**: p. 45673.
2. Wang, H., et al., *Antioxidant and antiinflammatory activities of anthocyanins and their aglycon, cyanidin, from tart cherries.* J Nat Prod, 1999. **62**(2): p. 294-6.
3. Seeram, N.P., Y. Zhang, and M.G. Nair, *Inhibition of proliferation of human cancer cells and cyclooxygenase enzymes by anthocyanidins and catechins.* Nutr Cancer, 2003. **46**(1): p. 101-6.
4. Muñoz-Espada, A.C. and B.A. Watkins, *Cyanidin attenuates PGE2 production and cyclooxygenase-2 expression in LNCaP human prostate cancer cells.* J Nutr Biochem, 2006. **17**(9): p. 589-96.
5. Min, S.W., S.N. Ryu, and D.H. Kim, *Anti-inflammatory effects of black rice, cyanidin-3-O-beta-D-glycoside, and its metabolites, cyanidin and protocatechuic acid.* Int Immunopharmacol, 2010. **10**(8): p. 959-66.
6. Dreiseitel, A., et al., *sPhospholipase A(2) is inhibited by anthocyanidins.* J Neural Transm (Vienna), 2009. **116**(9): p. 1071-7.
7. Hou, D.X., et al., *Anthocyanidins inhibit cyclooxygenase-2 expression in LPS-evoked macrophages: structure-activity relationship and molecular mechanisms involved.* Biochem Pharmacol, 2005. **70**(3): p. 417-25.
8. Kwon, J.Y., et al., *Peonidin inhibits phorbol-ester-induced COX-2 expression and transformation in JB6 P+ cells by blocking phosphorylation of ERK-1 and -2.* Ann N Y Acad Sci, 2007. **1095**: p. 513-20.

**Supplementary Table 3****All of the biological processes of the most common anthocyanidins treated IBD**

| GO-BP      | Category                | Description                                             | Count | %     | Log10(P) |
|------------|-------------------------|---------------------------------------------------------|-------|-------|----------|
| GO:0033674 | GO biological processes | Positive regulation of kinase activity                  | 15    | 34.09 | -12.995  |
| GO:1901699 | GO biological processes | Cellular response to nitrogen compound                  | 15    | 34.09 | -12.531  |
| GO:0034614 | GO biological processes | Cellular response to reactive oxygen species            | 10    | 22.73 | -12.374  |
| GO:1904645 | GO biological processes | Response to amyloid-beta                                | 7     | 15.91 | -10.918  |
| GO:2000377 | GO biological processes | Regulation of reactive oxygen species metabolic process | 9     | 20.45 | -10.166  |
| GO:0034762 | GO biological processes | Regulation of transmembrane transport                   | 12    | 27.27 | -9.576   |
| GO:0006690 | GO biological processes | Icosanoid metabolic process                             | 7     | 15.91 | -8.738   |
| GO:0060326 | GO biological processes | Cell chemotaxis                                         | 9     | 20.45 | -8.502   |
| GO:0019221 | GO biological processes | Cytokine-mediated signaling pathway                     | 12    | 27.27 | -7.960   |
| GO:0045124 | GO biological processes | Regulation of bone resorption                           | 5     | 11.36 | -7.911   |
| GO:0097237 | GO biological processes | cellular response to toxic substance                    | 8     | 18.18 | -7.84    |
| GO:0050878 | GO biological processes | regulation of body fluid levels                         | 9     | 20.45 | -6.6     |
| GO:0045907 | GO biological processes | positive regulation of vasoconstriction                 | 4     | 9.09  | -6.44    |
| GO:0008610 | GO biological processes | lipid biosynthetic process                              | 10    | 22.73 | -6.35    |
| GO:0030155 | GO biological processes | regulation of cell adhesion                             | 10    | 22.73 | -6.34    |
| GO:0045927 | GO biological processes | positive regulation of growth                           | 7     | 15.91 | -6.23    |

|            |                                      |                                                 |   |       |       |
|------------|--------------------------------------|-------------------------------------------------|---|-------|-------|
| GO:0031334 | processes<br>GO biological processes | positive regulation of protein complex assembly | 7 | 15.91 | -6.13 |
| GO:0031623 | GO biological processes              | receptor internalization                        | 5 | 11.36 | -5.72 |
| GO:0050727 | GO biological processes              | regulation of inflammatory response             | 8 | 18.18 | -5.51 |
| GO:0035690 | GO biological processes              | cellular response to drug                       | 7 | 15.91 | -5.34 |

**All of the KEGG pathways of the most common anthocyanidins treated IBD**

| KEGG     | Category     | Description                               | Count | %     | Log10(P) |
|----------|--------------|-------------------------------------------|-------|-------|----------|
| hsa01521 | KEGG pathway | EGFR tyrosine kinase inhibitor resistance | 8     | 18.18 | -11.86   |
| hsa04611 | KEGG pathway | Platelet activation                       | 7     | 15.91 | -8.64    |
| hsa04913 | KEGG pathway | Ovarian steroidogenesis                   | 5     | 11.36 | -7.52    |
| hsa05206 | KEGG pathway | MicroRNAs in cancer                       | 8     | 18.18 | -7.25    |
| hsa04520 | KEGG pathway | Adherens junction                         | 5     | 11.36 | -6.71    |
| hsa05202 | KEGG pathway | Transcriptional misregulation in cancer   | 6     | 13.64 | -6.08    |
| hsa00590 | KEGG pathway | Arachidonic acid metabolism               | 4     | 9.09  | -5.32    |
| hsa04921 | KEGG pathway | Oxytocin signaling pathway                | 5     | 11.36 | -5.1     |
| hsa04022 | KEGG pathway | cGMP-PKG signaling pathway                | 5     | 11.36 | -4.96    |
| hsa02010 | KEGG pathway | ABC transporters                          | 3     | 6.82  | -4.16    |
| hsa04080 | KEGG pathway | Neuroactive ligand-receptor interaction   | 5     | 11.36 | -3.86    |
| hsa04972 | KEGG pathway | Pancreatic secretion                      | 3     | 6.82  | -3.16    |
| hsa04010 | KEGG pathway | MAPK signaling pathway                    | 3     | 6.82  | -1.96    |
